# Supplementary material for: Sequence-Based Antigenic Analyses of H1 Swine Influenza A Viruses from Colombia (2008–2021) Reveals Temporal and Geographical Antigenic Variations
Source: MDPI journal article supplement (doi:10.3390/v15102030), 2023-09-30
Supplement: s1 [file s1]

**Table S1.** Reference strains used in the phylogenetic and antigenic analyses.

| Strain                                | Swine<br>Lineage/Clade | Subtype | Country  | Accession number |
|---------------------------------------|------------------------|---------|----------|------------------|
| A/swine/Iowa/15/1930                  | 1A.1                   | H1N1    | USA      | ABV25634.1       |
| A/swine/1/Wisconsin/1968              | 1A.1                   | H1N1    | USA      | ABV25636.1       |
| A/swine/Guangxi/12/2005               | 1A.1                   | H1N1    | China    | ADV69039.1       |
| A/swine/Hubei/HG394/2018              | 1A.1                   | H1N1    | China    | QOL21070.1       |
| A/swine/Colombia/0401/2008            | 1A.1                   | H1N1    | Colombia | AFU83122.1       |
| A/swine/Alberta/SD0154/2016           | 1A.1.1                 | H1N1    | Canada   | ATB53861.1       |
| A/swine/Minnesota/A01781045/2016      | 1A.1.1                 | H1N2    | USA      | AOX49803.1       |
| A/swine/Pennsylvania/A02478616/2019   | 1A.1.1                 | H1N2    | USA      | QEO64518.1       |
| A/swine/Alberta/SD0272/2018           | 1A.1.1                 | H1N2    | Canada   | QAX25196.1       |
| A/swine/Kyoto/3/1979                  | 1A.1-like              | H1N1    | Japan    | BAG49742.1       |
| A/swine/Tochigi/2/2011                | 1A.1-like              | H1N2    | Japan    | BAM78376.1       |
| A/swine/Korea/CAN01/2004              | 1A.2                   | H1N1    | Korea    | ACE77927.1       |
| A/swine/Kansas/A02245337/2019         | 1A.2                   | H1N1    | USA      | QHF16399.1       |
| A/swine/Texas/A01785906/2019          | 1A.2-like              | H1N1    | USA      | QBC17636.1       |
| a/swine/Mexico/AVX23/2012             | 1A.3.1                 | H1N1    | Mexico   | AMY15927.1       |
| A/swine/Mexico/GtoDMZC09/2015         | 1A.3.1                 | H1N1    | Mexico   | AVI59052.1       |
| A/swine/Valparaiso/VN1401-559/2014    | 1A.3.3.2               | H1N1    | Chile    | AYV62774.1       |
| A/swine/Rancagua/VN1401-1107/2015     | 1A.3.3.2               | H1N1    | Chile    | ARV89702.1       |
| A/California/07/2009                  | 1A.3.3.2               | H1N1    | USA      | YP_009118626.1   |
| A/swine/Illinois/A01493472/2014       | 1A.3.3.2               | H1N1    | USA      | AHY84443.1       |
| A/swine/Mexico/GtoDMZC04/2015         | 1A.3.3.2               | H1N2    | Mexico   | AVJ46821.1       |
| A/Jena/VI5258/2009                    | 1A.3.3.2               | H1N1    | Germany  | AGA19175.1       |
| A/swine/UP-India/IVRI01/2009          | 1A.3.3.2               | H1N1    | India    | AIT38443.1       |
| A/swine/Zambia/264/2018               | 1A.3.3.2               | H1N1    | Zambia   | BDA36499.1       |
| A/swine/Iowa/A02432387/2019           | 1A.3.3.2               | H1N1    | USA      | QCQ05164.1       |
| A/Swine/France/53-180028/2018         | 1A.3.3.2               | H1N1    | France   | AZN23219.1       |
| A/swine/Schallern/IDT19989/2014       | 1A.3.3.2               | H1N1    | Germany  | ANA11539.1       |
| A/swine/Nuble/VN1401-3960/2018        | 1A.3.3.2               | H1N1    | Chile    | QDA17083.1       |
| A/swine/South Korea/BRI5_HA/2020      | 1A.3.3.2               | H1N1    | Korea    | QHW05456.1       |
| A/swine/Zhejiang/SW64/2014            | 1A.3.3.2               | H1N2    | China    | ALT19800.1       |
| A/swine/Shandong/731/2009             | 1A.3.3.2               | H1N1    | China    | AEF28990.1       |
| A/pig/Aichi/101/2018                  | 1A.3.3.2               | H1N1    | Japan    | QPF21214.1       |
| A/swine/Japan/KU-YG5/2013             | 1A.3.3.2               | H1N1    | Japan    | AIT92741.1       |
| A/swine/Colombia/1-01/2009            | 1A.3.3.2               | H1N1    | Colombia | AFU83120.1       |
| A/Bogota/WR0090N/2009                 | 1A.3.3.2               | H1N1    | Colombia | ACY77554.1       |
| A/swine/Antioquia/3-020/2015          | 1A.3.3.2               | H1N1    | Colombia | AYD91054.1       |
| A/swine/Ohio/511445/2007              | 1A.3.3.3               | H1N1    | USA      | ACH69547.1       |
| A/swine/North_Carolina/A01730369/2016 | 1A.3.3.3               | H1N1    | USA      | AMM43240.1       |
| A/swine/Iowa/19TOSU2739/2019          | 1A.3.3.3               | H1N1    | USA      | QNH89409.1       |
| A/swine/Scotland/410440/1994          | 1B.1                   | H1N2    | Scotland | AAD05215.1       |
| A/swine/Bakum/1832/2000               | 1B.1.2.1               | H1N2    | Germany  | ACR39182.1       |
| A/swine/Italy/60591/2018              | 1B.1.2.2               | H1N2    | Italy    | AYM94710.1       |
| A/swine/Illinois/A02139356/2018       | 1B.2.1                 | H1N2    | USA      | AVA07303.1       |
| A/swine/Mexico/GtoDMZC01/2014         | 1B.2.1                 | H1N2    | Mexico   | AKQ43522.1       |
| A/swine/Indiana/A02524527/2020        | 1B.2.1                 | H1N2    | USA      | QNL13973.1       |
| A/swine/Alabama/A01104091/2016        | 1B.2.2.1               | H1N2    | USA      | ANJ61799.1       |
| A/swine/Illinois/A01644323/2018       | 1B.2.2.1               | H1N2    | USA      | AUS83524.1       |
| A/swine/Iowa/A02524587/2020           | 1B.2.2.1               | H1N2    | USA      | QOH31678.1       |

|                                        |            |      |           |            |
|----------------------------------------|------------|------|-----------|------------|
| A/swine/South Dakota/A02479076/2020    | 1B.2.2.2   | H1N2 | USA       | QIP75475.1 |
| A/swine/Chile/VN1401-274/2014          | 1B.2-other | H1N2 | Chile     | ARV89358.1 |
| A/swine/Chile/VN1401-4/2014            | 1B.2-other | H1N1 | Chile     | ARV89416.1 |
| A/swine/Chile/VN1401-339/2014          | 1B.2-other | H1N2 | Chile     | ARV89385.1 |
| A/swine/Mexico/AVX61/2013              | 1B.2-other | H1N2 | Mexico    | AMY16231.1 |
| A/swine/Binh Duong/02-16/2010          | 1B.2-other | H1N2 | Vietnam   | BAN14742.1 |
| A/swine/O'Higgins/VN1401-4005/2018     | 1B.2-other | H1N2 | Chile     | QDA17400.1 |
| A/swine/Finistere/2899/1982            | 1C.1       | H1N1 | France    | AFR76505.1 |
| A/swine/Belgium/1/1998                 | 1C.2       | H1N1 | France    | ACN67524.1 |
| A/Swine/France/65-150242/2015          | 1C.2       | H1N2 | France    | QJD66075.1 |
| A/swine/France/22-200113/2020          | 1C.2       | H1N2 | France    | QUQ73516.1 |
| A/Swine/France/Cotes_d'Armor-0388/2009 | 1C.2.1     | H1N1 | France    | AGK62667.1 |
| A/swine/Italy/91162/2018               | 1C.2.1     | H1N1 | Italy     | AYM94721.1 |
| A/swine/Haseluenne/IDT2617/2003        | 1C.2.2     | H1N1 | Germany   | ACR39185.1 |
| A/swine/China/01/2019                  | 1C.2.3     | H1N1 | China     | QMS51333.1 |
| A/Medellin/WRAIR1297P/2008             | Human      | H1N1 | Colombia  | AET84306.2 |
| A/Michigan/45/2015                     | 1A.3.3.2   | H1N1 | USA       | QBL89789.1 |
| A/Brisbane/59/2007                     | Human      | H1N1 | Australia | AJK02677.1 |

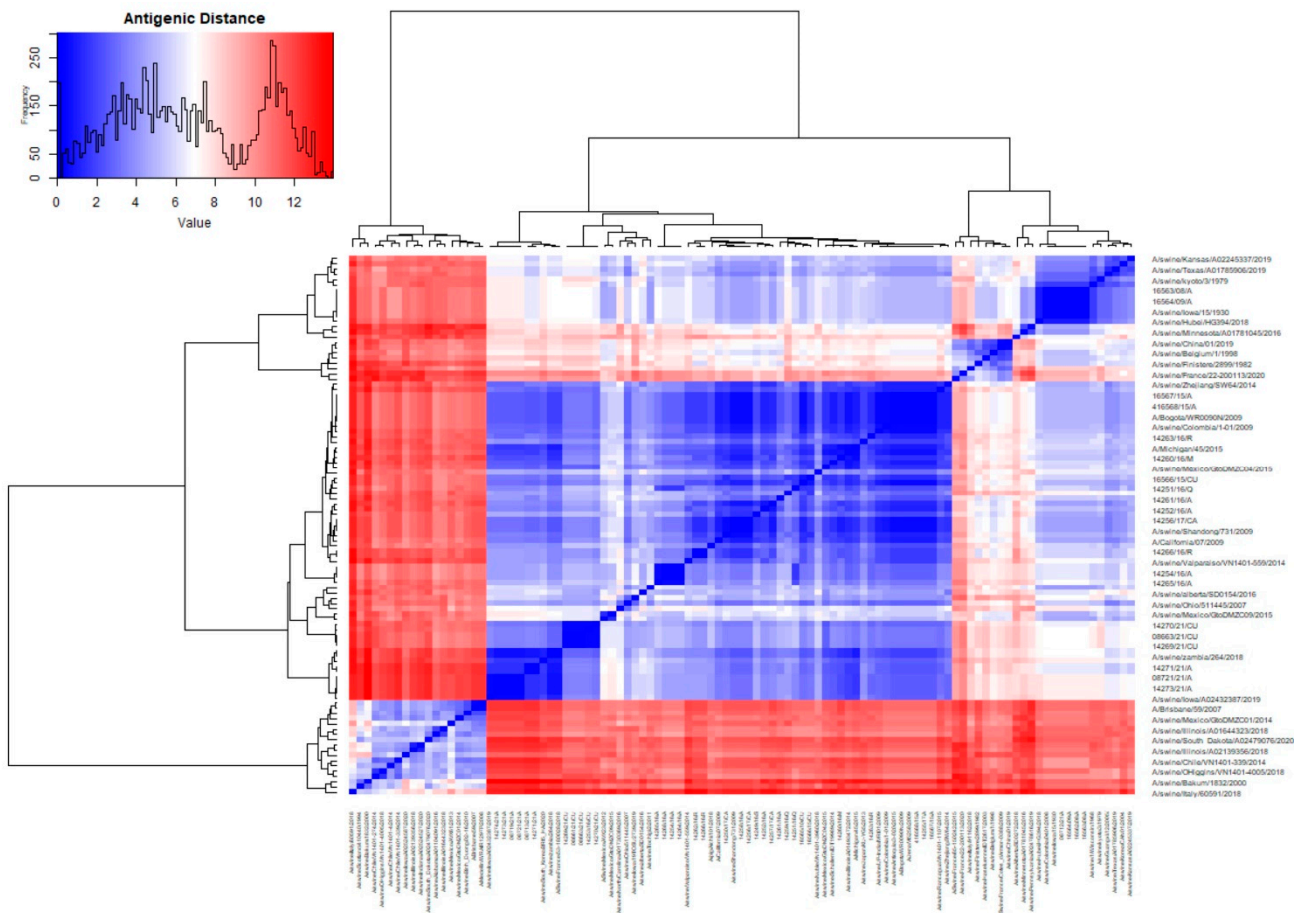

**Figure S1.** Heatmap of the antigenic distance matrix among H1 Swine Influenza A Virus. The figure shows a symmetric color pattern distributed according to the hierarchical clustering.

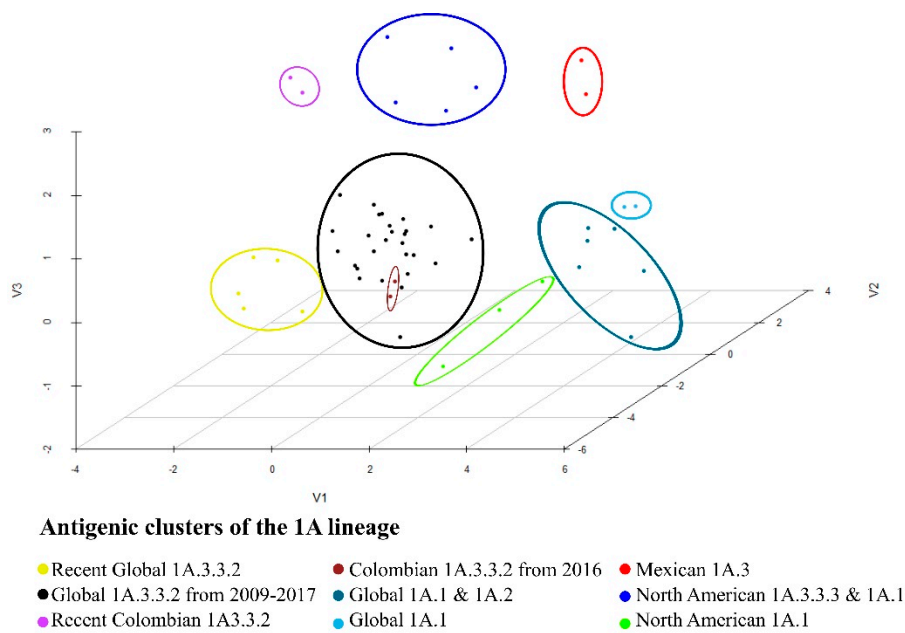

**Figure S2.** Antigenic three-dimensional map of the clusters in the 1A lineage. The figure shows the antigenic distance existing between the nine calculated antigenic clusters. Each virus was represented as points and colored according to the assigned cluster.

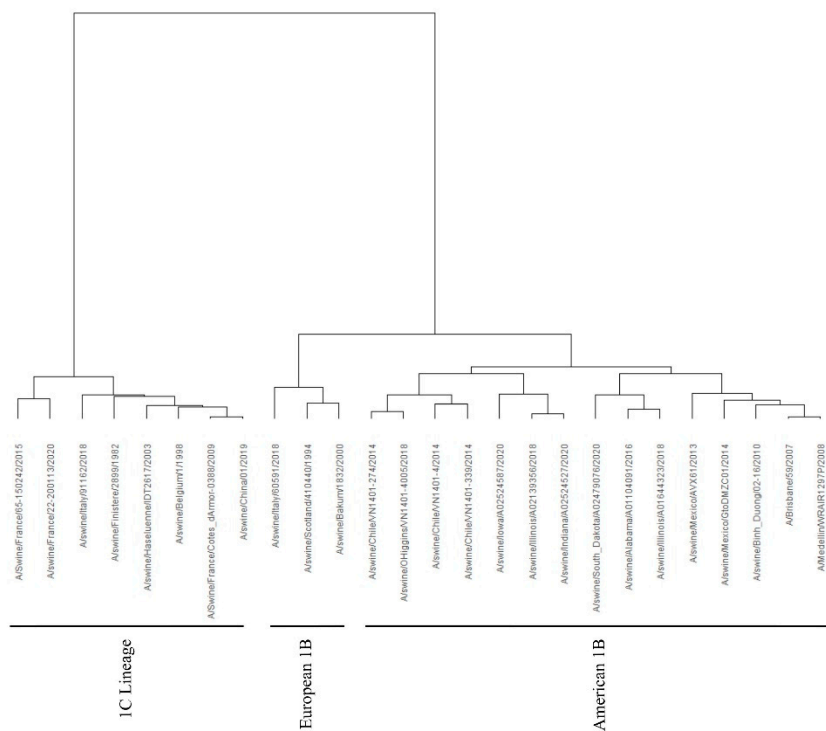

**Figure S3.** Antigenic dendrogram and clusters of the H1 1B and 1C lineages of the Swine Influenza A virus.

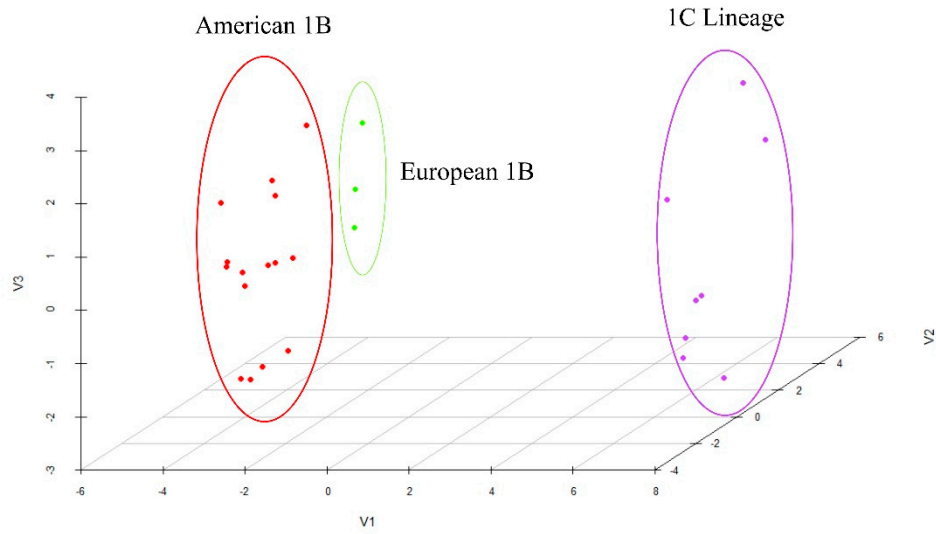

**Figure S4.** Antigenic three-dimensional map of the clusters in the 1B and 1C lineage. The figure represents the high antigenic distance existence between the 1C and the two 1B clusters. Viruses are presents as points colored according to clustering analysis.

**Table S2.** N-Glycosylation motifs predicted in analyzed sequences.

| Strain                      | Motifs | Residues              |
|-----------------------------|--------|-----------------------|
| A/swine/Colombia/16562/2008 | 4      | 11, 23, 287, 540      |
| A/swine/Colombia/16563/2008 | 4      | 11, 23, 287, 540      |
| A/swine/Colombia/16564/2009 | 4      | 11, 23, 287, 540      |
| A/swine/Colombia/16567/2015 | 4      | 11, 23, 287, 540      |
| A/swine/Colombia/16568/2015 | 4      | 11, 23, 287, 540      |
| A/swine/Colombia/14254/2016 | 5      | 11, 23, 160, 287, 540 |
| A/swine/Colombia/14258/2016 | 4      | 11, 23, 287, 540      |
| A/swine/Colombia/14264/2016 | 5      | 11, 23, 160, 287, 540 |
| A/swine/Colombia/14268/2016 | 5      | 11, 23, 160, 287, 540 |
| A/swine/Colombia/14252/2016 | 4      | 11, 23, 287, 540      |
| A/swine/Colombia/14265/2016 | 5      | 11, 23, 160, 287, 540 |
| A/swine/Colombia/14261/2016 | 4      | 11, 23, 287, 540      |
| A/swine/Colombia/14255/2017 | 4      | 11, 23, 287, 540      |
| A/swine/Colombia/08712/2021 | 4      | 11, 23, 287, 540      |
| A/swine/Colombia/08713/2021 | 4      | 11, 23, 287, 540      |
| A/swine/Colombia/14271/2021 | 4      | 11, 23, 287, 540      |
| A/swine/Colombia/08719/2021 | 5      | 11, 23, 162, 287, 540 |
| A/swine/Colombia/08721/2021 | 5      | 11, 23, 162, 287, 540 |
| A/swine/Colombia/14273/2021 | 5      | 11, 23, 162, 287, 540 |
| A/swine/Colombia/14274/2021 | 5      | 11, 23, 162, 287, 540 |
| A/swine/Colombia/14250/2017 | 4      | 11, 23, 287, 540      |
| A/swine/Colombia/14256/2017 | 4      | 11, 23, 287, 540      |
| A/swine/Colombia/14257/2017 | 4      | 11, 23, 287, 540      |
| A/swine/Colombia/16565/2010 | 4      | 11, 23, 287, 540      |
| A/swine/Colombia/16566/2015 | 4      | 11, 23, 287, 540      |
| A/swine/Colombia/14253/2016 | 4      | 11, 23, 287, 540      |

---

|                             |   |                  |
|-----------------------------|---|------------------|
| A/swine/Colombia/08661/2021 | 3 | 11, 23, 240      |
| A/swine/Colombia/08663/2021 | 3 | 11, 23, 240      |
| A/swine/Colombia/14269/2021 | 3 | 11, 23, 240      |
| A/swine/Colombia/14270/2021 | 3 | 11, 23, 240      |
| A/swine/Colombia/14260/2016 | 4 | 11, 23, 287, 540 |
| A/swine/Colombia/14259/2016 | 4 | 11, 23, 287, 540 |
| A/swine/Colombia/14251/2016 | 4 | 11, 23, 287, 540 |
| A/swine/Colombia/14262/2016 | 4 | 11, 23, 287, 540 |
| A/swine/Colombia/14266/2016 | 4 | 11, 23, 287, 540 |
| A/swine/Colombia/14263/2016 | 4 | 11, 23, 287, 540 |
| A/swine/Colombia/14249/2016 | 4 | 11, 23, 287, 540 |

---
